# Supplementary material
Source: publisher site journal article supplement (http://e-cmh.org/upload/media/cmh-2020-0261-suppl3.xls)
Supplement: Supplementary file 1 [file cmh-2020-0261-suppl3.xls]

## Sheet: Cutoff values_NASH
Coordinates of the Curve
Test Result Variable(s): Serum LCN2
Positive if Greater Than or Equal Toa	Sensitivity	1 - Specificity	Spe	Sen+Spe
14.17	1	1	0	1
16.11	1	0.975	0.025	1.025
17.185	1	0.95	0.05	1.05
18.045	1	0.925	0.075	1.075
19.13	1	0.9	0.1	1.1
20.06	1	0.875	0.125	1.125
20.83	1	0.85	0.15	1.15
21.19	1	0.825	0.175	1.175
22.175	1	0.8	0.2	1.2
23.665	0.99639	0.8	0.2	1.19639
24.5	0.99639	0.775	0.225	1.22139
24.92	0.99639	0.75	0.25	1.24639
25.255	0.99639	0.725	0.275	1.27139
25.52	0.99639	0.7	0.3	1.29639
26.14	0.99639	0.675	0.325	1.32139
27.28	0.99639	0.65	0.35	1.34639
28.16	0.99639	0.625	0.375	1.37139
28.535	0.99639	0.6	0.4	1.39639
28.965	0.99639	0.575	0.425	1.42139
29.675	0.99639	0.55	0.45	1.44639
30.5	0.99278	0.55	0.45	1.44278
31.04	0.99278	0.525	0.475	1.46778
31.815	0.99278	0.5	0.5	1.49278
32.9	0.98917	0.5	0.5	1.48917
33.41	0.98917	0.475	0.525	1.51417
33.8	0.98917	0.45	0.55	1.53917
34.81	0.98917	0.425	0.575	1.56417
35.61	0.98917	0.4	0.6	1.58917
36.1	0.98917	0.375	0.625	1.61417
36.44	0.98917	0.35	0.65	1.63917
36.525	0.98556	0.35	0.65	1.63556
37.18	0.98556	0.325	0.675	1.66056
37.795	0.981949	0.325	0.675	1.65695
38.555	0.981949	0.3	0.7	1.68195
39.805	0.981949	0.275	0.725	1.70695
40.775	0.981949	0.25	0.75	1.73195
42.37	0.981949	0.225	0.775	1.75695
43.74	0.981949	0.2	0.8	1.78195
44.295	0.981949	0.175	0.825	1.80695
45.22	0.978339	0.175	0.825	1.80334
45.855	0.978339	0.15	0.85	1.82834
46.105	0.974729	0.15	0.85	1.82473
46.425	0.971119	0.15	0.85	1.82112
46.61	0.971119	0.125	0.875	1.84612
46.695	0.971119	0.1	0.9	1.87112
46.8	0.967509	0.1	0.9	1.86751
46.985	0.963899	0.1	0.9	1.8639
47.14	0.960289	0.1	0.9	1.86029
47.22	0.956679	0.1	0.9	1.85668
47.275	0.956679	0.075	0.925	1.88168
47.385	0.953069	0.075	0.925	1.87807
47.48	0.953069	0.05	0.95	1.90307
47.69	0.949458	0.05	0.95	1.89946
47.905	0.942238	0.05	0.95	1.89224
48.04	0.938628	0.05	0.95	1.88863
48.22	0.935018	0.05	0.95	1.88502
48.55	0.935018	0.025	0.975	1.91002
49.205	0.935018	0	1	1.93502
49.84	0.931408	0	1	1.93141
50.325	0.927798	0	1	1.9278
50.755	0.924188	0	1	1.92419
51.035	0.920578	0	1	1.92058
51.165	0.916968	0	1	1.91697
51.425	0.913357	0	1	1.91336
51.665	0.909747	0	1	1.90975
52.475	0.906137	0	1	1.90614
53.465	0.902527	0	1	1.90253
53.705	0.898917	0	1	1.89892
54.11	0.895307	0	1	1.89531
54.74	0.891697	0	1	1.8917
55.17	0.888087	0	1	1.88809
55.845	0.884477	0	1	1.88448
56.39	0.880866	0	1	1.88087
56.47	0.877256	0	1	1.87726
56.8	0.873646	0	1	1.87365
57.17	0.870036	0	1	1.87004
57.59	0.866426	0	1	1.86643
58.035	0.862816	0	1	1.86282
58.255	0.859206	0	1	1.85921
58.655	0.855596	0	1	1.8556
59.385	0.851986	0	1	1.85199
59.82	0.848375	0	1	1.84838
59.905	0.844765	0	1	1.84477
60.005	0.841155	0	1	1.84116
60.105	0.837545	0	1	1.83755
60.41	0.833935	0	1	1.83394
60.795	0.830325	0	1	1.83032
61.04	0.826715	0	1	1.82671
61.235	0.823105	0	1	1.8231
61.48	0.819495	0	1	1.81949
61.795	0.815884	0	1	1.81588
62.035	0.812274	0	1	1.81227
62.255	0.808664	0	1	1.80866
62.415	0.805054	0	1	1.80505
62.51	0.801444	0	1	1.80144
62.76	0.797834	0	1	1.79783
62.95	0.794224	0	1	1.79422
63.06	0.790614	0	1	1.79061
63.29	0.787004	0	1	1.787
63.45	0.783394	0	1	1.78339
63.805	0.779783	0	1	1.77978
64.24	0.776173	0	1	1.77617
64.5	0.772563	0	1	1.77256
65.025	0.768953	0	1	1.76895
65.8	0.765343	0	1	1.76534
66.425	0.761733	0	1	1.76173
66.68	0.758123	0	1	1.75812
67.265	0.754513	0	1	1.75451
67.955	0.750903	0	1	1.7509
68.12	0.747292	0	1	1.74729
68.21	0.743682	0	1	1.74368
68.38	0.740072	0	1	1.74007
68.72	0.736462	0	1	1.73646
69.14	0.732852	0	1	1.73285
69.715	0.729242	0	1	1.72924
70.425	0.725632	0	1	1.72563
70.74	0.722022	0	1	1.72202
70.795	0.718412	0	1	1.71841
70.89	0.714801	0	1	1.7148
70.955	0.711191	0	1	1.71119
70.975	0.707581	0	1	1.70758
71.045	0.703971	0	1	1.70397
71.12	0.700361	0	1	1.70036
71.305	0.696751	0	1	1.69675
71.66	0.693141	0	1	1.69314
71.92	0.689531	0	1	1.68953
72.01	0.685921	0	1	1.68592
72.065	0.68231	0	1	1.68231
72.33	0.6787	0	1	1.6787
72.605	0.67509	0	1	1.67509
72.73	0.67148	0	1	1.67148
72.855	0.66787	0	1	1.66787
73.31	0.66426	0	1	1.66426
73.83	0.66065	0	1	1.66065
74.07	0.65704	0	1	1.65704
74.205	0.65343	0	1	1.65343
74.375	0.649819	0	1	1.64982
74.78	0.646209	0	1	1.64621
75.47	0.642599	0	1	1.6426
75.955	0.635379	0	1	1.63538
76.115	0.631769	0	1	1.63177
76.27	0.628159	0	1	1.62816
76.79	0.624549	0	1	1.62455
77.295	0.620939	0	1	1.62094
77.335	0.617329	0	1	1.61733
77.39	0.613718	0	1	1.61372
77.465	0.610108	0	1	1.61011
77.63	0.606498	0	1	1.6065
77.8	0.602888	0	1	1.60289
77.91	0.599278	0	1	1.59928
78.12	0.595668	0	1	1.59567
78.395	0.592058	0	1	1.59206
79.09	0.588448	0	1	1.58845
79.665	0.584838	0	1	1.58484
79.715	0.581227	0	1	1.58123
79.785	0.577617	0	1	1.57762
80.04	0.574007	0	1	1.57401
80.61	0.570397	0	1	1.5704
81.22	0.566787	0	1	1.56679
81.5	0.563177	0	1	1.56318
81.775	0.559567	0	1	1.55957
82.495	0.555957	0	1	1.55596
82.985	0.552347	0	1	1.55235
83.125	0.548736	0	1	1.54874
83.32	0.545126	0	1	1.54513
83.445	0.541516	0	1	1.54152
83.625	0.537906	0	1	1.53791
83.91	0.534296	0	1	1.5343
84.335	0.530686	0	1	1.53069
84.645	0.527076	0	1	1.52708
84.925	0.523466	0	1	1.52347
85.185	0.519856	0	1	1.51986
85.245	0.516245	0	1	1.51625
85.3	0.512635	0	1	1.51264
85.505	0.509025	0	1	1.50903
85.76	0.505415	0	1	1.50542
86.02	0.501805	0	1	1.50181
86.25	0.498195	0	1	1.49819
86.365	0.494585	0	1	1.49458
86.555	0.490975	0	1	1.49097
87.095	0.487365	0	1	1.48736
87.77	0.483755	0	1	1.48375
88.61	0.480144	0	1	1.48014
89.25	0.476534	0	1	1.47653
89.295	0.472924	0	1	1.47292
89.46	0.469314	0	1	1.46931
90.25	0.465704	0	1	1.4657
91.215	0.462094	0	1	1.46209
91.62	0.458484	0	1	1.45848
91.74	0.454874	0	1	1.45487
91.795	0.451264	0	1	1.45126
91.89	0.447653	0	1	1.44765
92.03	0.444043	0	1	1.44404
92.285	0.440433	0	1	1.44043
92.61	0.436823	0	1	1.43682
92.795	0.433213	0	1	1.43321
92.885	0.429603	0	1	1.4296
92.915	0.425993	0	1	1.42599
93.04	0.422383	0	1	1.42238
93.34	0.418773	0	1	1.41877
93.74	0.411552	0	1	1.41155
93.965	0.407942	0	1	1.40794
94.01	0.404332	0	1	1.40433
94.14	0.400722	0	1	1.40072
94.24	0.397112	0	1	1.39711
94.28	0.393502	0	1	1.3935
94.315	0.389892	0	1	1.38989
94.44	0.386282	0	1	1.38628
94.57	0.382671	0	1	1.38267
94.62	0.379061	0	1	1.37906
94.7	0.375451	0	1	1.37545
94.885	0.371841	0	1	1.37184
95.23	0.368231	0	1	1.36823
95.49	0.364621	0	1	1.36462
95.575	0.361011	0	1	1.36101
95.645	0.357401	0	1	1.3574
95.995	0.353791	0	1	1.35379
96.34	0.350181	0	1	1.35018
96.545	0.34296	0	1	1.34296
96.955	0.33935	0	1	1.33935
97.435	0.33574	0	1	1.33574
97.675	0.33213	0	1	1.33213
97.855	0.32852	0	1	1.32852
98.39	0.3213	0	1	1.3213
98.855	0.31769	0	1	1.31769
99.26	0.314079	0	1	1.31408
99.875	0.310469	0	1	1.31047
100.24	0.306859	0	1	1.30686
101.09	0.303249	0	1	1.30325
102.37	0.299639	0	1	1.29964
102.885	0.296029	0	1	1.29603
102.945	0.292419	0	1	1.29242
103.065	0.288809	0	1	1.28881
103.705	0.285199	0	1	1.2852
104.265	0.281588	0	1	1.28159
104.715	0.277978	0	1	1.27798
105.4	0.274368	0	1	1.27437
105.835	0.270758	0	1	1.27076
106.16	0.267148	0	1	1.26715
106.33	0.263538	0	1	1.26354
106.405	0.259928	0	1	1.25993
106.685	0.256318	0	1	1.25632
107.25	0.252708	0	1	1.25271
107.615	0.249097	0	1	1.2491
107.72	0.245487	0	1	1.24549
107.865	0.241877	0	1	1.24188
108	0.238267	0	1	1.23827
108.12	0.234657	0	1	1.23466
108.875	0.231047	0	1	1.23105
109.745	0.227437	0	1	1.22744
110.045	0.223827	0	1	1.22383
110.41	0.220217	0	1	1.22022
111.35	0.216606	0	1	1.21661
112.075	0.212996	0	1	1.213
112.195	0.209386	0	1	1.20939
113.065	0.205776	0	1	1.20578
114.09	0.202166	0	1	1.20217
114.61	0.198556	0	1	1.19856
115.22	0.194946	0	1	1.19495
115.705	0.191336	0	1	1.19134
116.13	0.187726	0	1	1.18773
117.23	0.184116	0	1	1.18412
119.035	0.180505	0	1	1.18051
120.485	0.176895	0	1	1.1769
121.12	0.173285	0	1	1.17329
121.52	0.169675	0	1	1.16968
122.05	0.166065	0	1	1.16606
123.855	0.162455	0	1	1.16245
125.645	0.158845	0	1	1.15884
126.61	0.155235	0	1	1.15523
127.425	0.151625	0	1	1.15162
127.58	0.144404	0	1	1.1444
128.055	0.140794	0	1	1.14079
128.93	0.137184	0	1	1.13718
130.71	0.133574	0	1	1.13357
132.155	0.129964	0	1	1.12996
132.315	0.126354	0	1	1.12635
133.08	0.122744	0	1	1.12274
133.8	0.119134	0	1	1.11913
134.845	0.115523	0	1	1.11552
137.2	0.111913	0	1	1.11191
138.955	0.108303	0	1	1.1083
139.51	0.104693	0	1	1.10469
140.17	0.101083	0	1	1.10108
141.045	0.0974729	0	1	1.09747
141.505	0.0938628	0	1	1.09386
142.5	0.0902527	0	1	1.09025
144.28	0.0866426	0	1	1.08664
146.11	0.0830325	0	1	1.08303
147.195	0.0794224	0	1	1.07942
148.68	0.0758123	0	1	1.07581
152.46	0.0722022	0	1	1.0722
154.955	0.0685921	0	1	1.06859
155.925	0.0649819	0	1	1.06498
158.265	0.0613718	0	1	1.06137
160.19	0.0577617	0	1	1.05776
161.49	0.0541516	0	1	1.05415
164.205	0.0505415	0	1	1.05054
169.24	0.0469314	0	1	1.04693
172.44	0.0433213	0	1	1.04332
172.85	0.0397112	0	1	1.03971
175.07	0.0361011	0	1	1.0361
182.6	0.032491	0	1	1.03249
188.555	0.0288809	0	1	1.02888
191.73	0.0252708	0	1	1.02527
195.23	0.0216606	0	1	1.02166
195.905	0.0180505	0	1	1.01805
196.19	0.0144404	0	1	1.01444
230.18	0.0108303	0	1	1.01083
268.68	0.00722022	0	1	1.00722
349.6	0.00361011	0	1	1.00361
426.76	0	0	1	1

## Sheet: Cutoff values_Steatosis
Coordinates of the Curve
Test Result Variable(s): Serum LCN2
Positive if Greater Than or Equal Toa	Sensitivity	1 - Specificity	Spe	Sen+Spe
14.17	1	1	0	1
16.11	1	0.975	0.025	1.025
17.185	1	0.95	0.05	1.05
18.045	1	0.925	0.075	1.075
19.13	1	0.9	0.1	1.1
20.06	1	0.875	0.125	1.125
20.83	1	0.85	0.15	1.15
21.19	1	0.825	0.175	1.175
22.84	1	0.8	0.2	1.2
24.5	1	0.775	0.225	1.225
24.92	1	0.75	0.25	1.25
25.255	1	0.725	0.275	1.275
25.52	1	0.7	0.3	1.3
26.14	1	0.675	0.325	1.325
26.705	1	0.65	0.35	1.35
27.405	0.987952	0.65	0.35	1.33795
28.16	0.987952	0.625	0.375	1.36295
28.535	0.987952	0.6	0.4	1.38795
28.965	0.987952	0.575	0.425	1.41295
30.025	0.987952	0.55	0.45	1.43795
31.04	0.987952	0.525	0.475	1.46295
31.525	0.987952	0.5	0.5	1.48795
32.61	0.975904	0.5	0.5	1.4759
33.41	0.975904	0.475	0.525	1.5009
33.8	0.975904	0.45	0.55	1.5259
34.81	0.975904	0.425	0.575	1.5509
35.61	0.975904	0.4	0.6	1.5759
36.1	0.975904	0.375	0.625	1.6009
36.505	0.975904	0.35	0.65	1.6259
37.205	0.975904	0.325	0.675	1.6509
38.555	0.975904	0.3	0.7	1.6759
39.805	0.975904	0.275	0.725	1.7009
40.605	0.975904	0.25	0.75	1.7259
41.06	0.963855	0.25	0.75	1.71386
42.37	0.963855	0.225	0.775	1.73886
43.545	0.963855	0.2	0.8	1.76386
43.755	0.951807	0.2	0.8	1.75181
43.95	0.939759	0.2	0.8	1.73976
44.895	0.939759	0.175	0.825	1.76476
46.175	0.939759	0.15	0.85	1.78976
46.61	0.939759	0.125	0.875	1.81476
46.96	0.939759	0.1	0.9	1.83976
47.34	0.939759	0.075	0.925	1.86476
47.69	0.939759	0.05	0.95	1.88976
48.115	0.927711	0.05	0.95	1.87771
48.435	0.927711	0.025	0.975	1.90271
48.685	0.915663	0.025	0.975	1.89066
48.81	0.915663	0	1	1.91566
49.23	0.903614	0	1	1.90361
50.18	0.891566	0	1	1.89157
50.92	0.879518	0	1	1.87952
51.255	0.86747	0	1	1.86747
51.77	0.855422	0	1	1.85542
53.13	0.843373	0	1	1.84337
54.225	0.831325	0	1	1.83133
55.75	0.819277	0	1	1.81928
60.36	0.807229	0	1	1.80723
63.845	0.795181	0	1	1.79518
64.135	0.783133	0	1	1.78313
64.425	0.771084	0	1	1.77108
64.805	0.759036	0	1	1.75904
65.185	0.746988	0	1	1.74699
65.665	0.73494	0	1	1.73494
66.52	0.722892	0	1	1.72289
67.21	0.710843	0	1	1.71084
68.275	0.698795	0	1	1.6988
70.56	0.686747	0	1	1.68675
71.855	0.674699	0	1	1.6747
73.06	0.662651	0	1	1.66265
74.305	0.650602	0	1	1.6506
75.04	0.638554	0	1	1.63855
75.84	0.626506	0	1	1.62651
76.025	0.614458	0	1	1.61446
76.45	0.60241	0	1	1.60241
76.925	0.590361	0	1	1.59036
77.185	0.578313	0	1	1.57831
77.565	0.566265	0	1	1.56627
77.865	0.554217	0	1	1.55422
78.43	0.542169	0	1	1.54217
79.1	0.53012	0	1	1.53012
79.785	0.518072	0	1	1.51807
80.85	0.493976	0	1	1.49398
81.455	0.481928	0	1	1.48193
81.49	0.46988	0	1	1.46988
82.35	0.457831	0	1	1.45783
83.27	0.445783	0	1	1.44578
83.605	0.433735	0	1	1.43373
84.155	0.421687	0	1	1.42169
84.53	0.409639	0	1	1.40964
85.015	0.39759	0	1	1.39759
85.83	0.385542	0	1	1.38554
86.275	0.373494	0	1	1.37349
86.675	0.361446	0	1	1.36145
87.335	0.349398	0	1	1.3494
88.575	0.325301	0	1	1.3253
90.02	0.313253	0	1	1.31325
90.575	0.301205	0	1	1.3012
90.755	0.289157	0	1	1.28916
92.05	0.277108	0	1	1.27711
93.38	0.26506	0	1	1.26506
93.65	0.253012	0	1	1.25301
94.295	0.240964	0	1	1.24096
94.915	0.228916	0	1	1.22892
95.235	0.216867	0	1	1.21687
95.5	0.204819	0	1	1.20482
95.84	0.192771	0	1	1.19277
96.19	0.180723	0	1	1.18072
96.52	0.168675	0	1	1.16867
96.94	0.156627	0	1	1.15663
97.185	0.144578	0	1	1.14458
97.38	0.13253	0	1	1.13253
98.065	0.120482	0	1	1.12048
99.72	0.108434	0	1	1.10843
101.005	0.0963855	0	1	1.09639
101.81	0.0843373	0	1	1.08434
103.575	0.0722892	0	1	1.07229
106.075	0.060241	0	1	1.06024
110.415	0.0481928	0	1	1.04819
114.985	0.0361446	0	1	1.03614
133.58	0.0240964	0	1	1.0241
158.095	0.0120482	0	1	1.01205
166.56	0	0	1	1
137.775	0.0967742	0	1	1.09677
143.62	0.0860215	0	1	1.08602
149.28	0.0752688	0	1	1.07527
153.315	0.0645161	0	1	1.06452
160.07	0.0537634	0	1	1.05376
164.85	0.0430108	0	1	1.04301
169.845	0.0322581	0	1	1.03226
175.485	0.0215054	0	1	1.02151
180.775	0.0107527	0	1	1.01075
185.71	0	0	1	1
